# Supplementary material
Source: Springer Nature journal article supplement (https://www.springermedizin.de/resource/supplementary/12943_2009_618_MOESM7_ESM.pdf/9554420)
Supplement: MOESM7 [file 9554420]

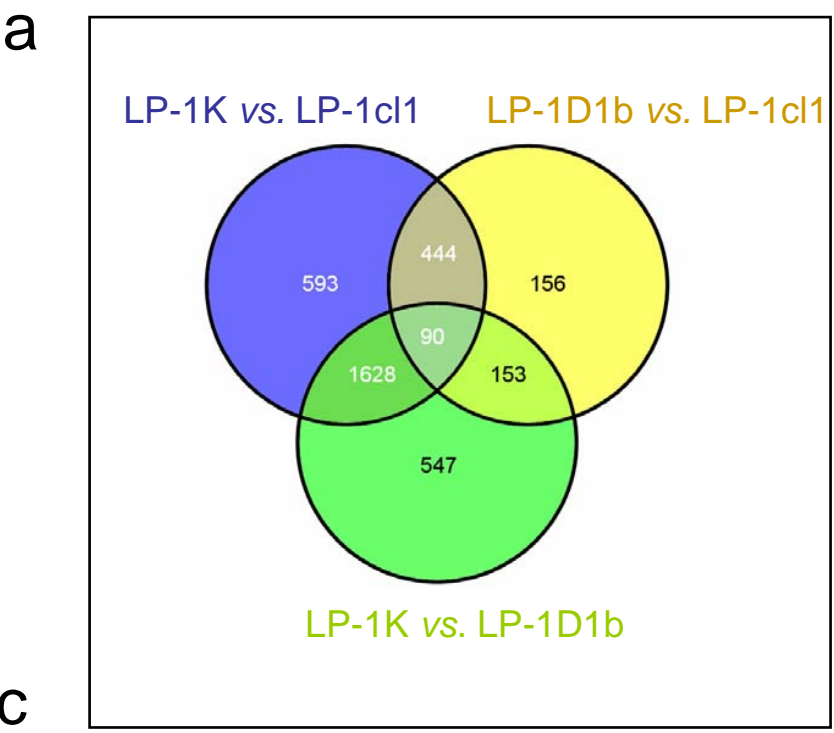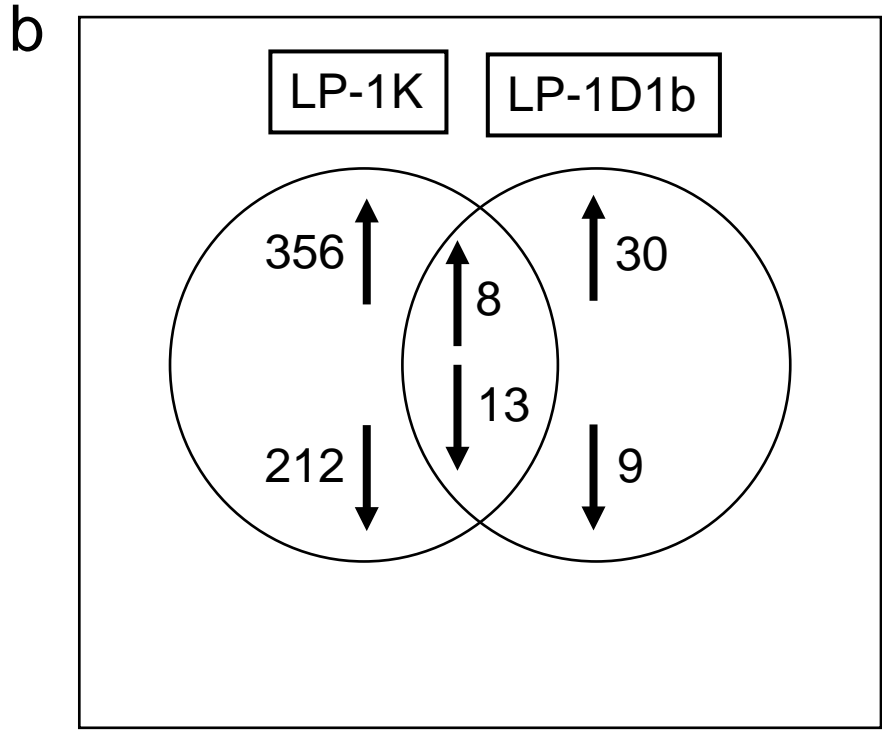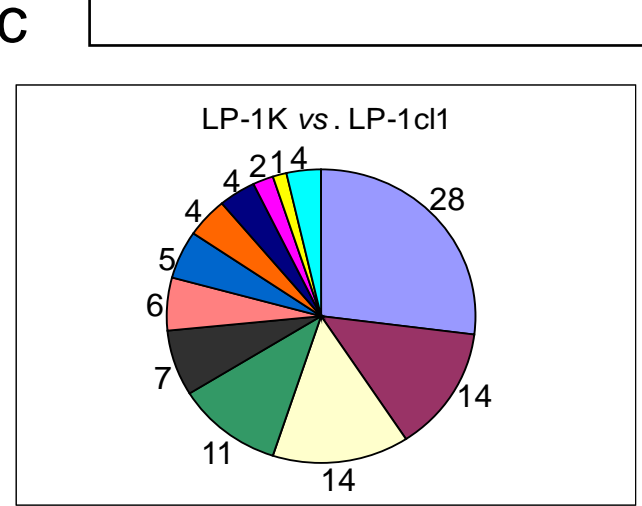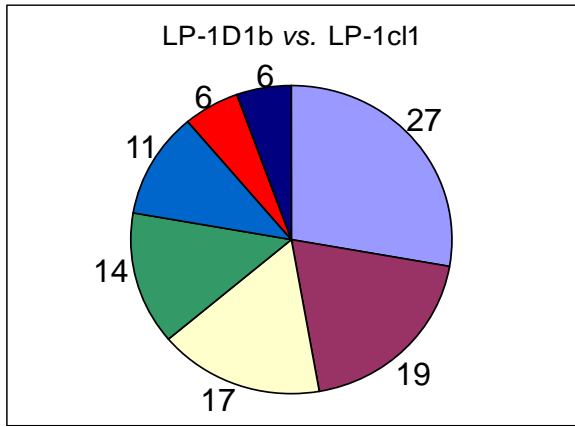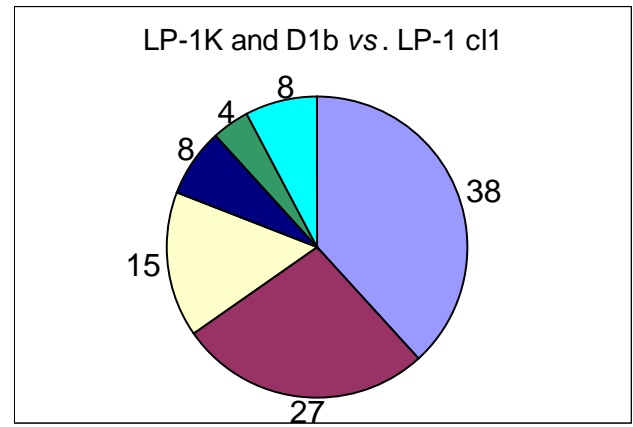

- Metabolism
- Cell adhesion
- Apoptosis
- Others
- Signal transduction
- Immune response
- Cell structure
- Cell motion
- Transport
- Cell cycle
- Cell proliferation
- Hematopoiesis
- Transcription/translation regulation
